# Supplementary material for: Facile synthesis of photolabile dendritic-unit-bridged hyperbranched graft copolymers for stimuli-triggered topological transition and controlled release of Nile red
Source: Royal Society of Chemistry journal article supplement (doi:10.1039/c5py00132c), 2015-01-01
Supplement: c5py00132c1.pdf [file c5py00132c1.pdf]

## Supporting Information

# Facile synthesis of photolabile dendritic-unit-bridged hyperbranched graft copolymers for stimuli-triggered topological transition and controlled release of Nile red

Bin Mo,<sup>a</sup> Huanhuan Liu,<sup>a</sup> Xiangdong Zhou<sup>b</sup> and Youliang Zhao<sup>\*a</sup>

<sup>a</sup> Suzhou Key Laboratory of Macromolecular Design and Precision Synthesis, Jiangsu Key Laboratory of Advanced Functional Polymer Design and Application, College of Chemistry, Chemical Engineering and Materials Science, Soochow University, Suzhou 215123, China. Tel: +86-512-65882045; Fax: +86-512-65882045; E-mail: ylzha@suda.edu.cn

<sup>b</sup> College of Textile and Clothing Engineering, Soochow University, Suzhou 215123, China

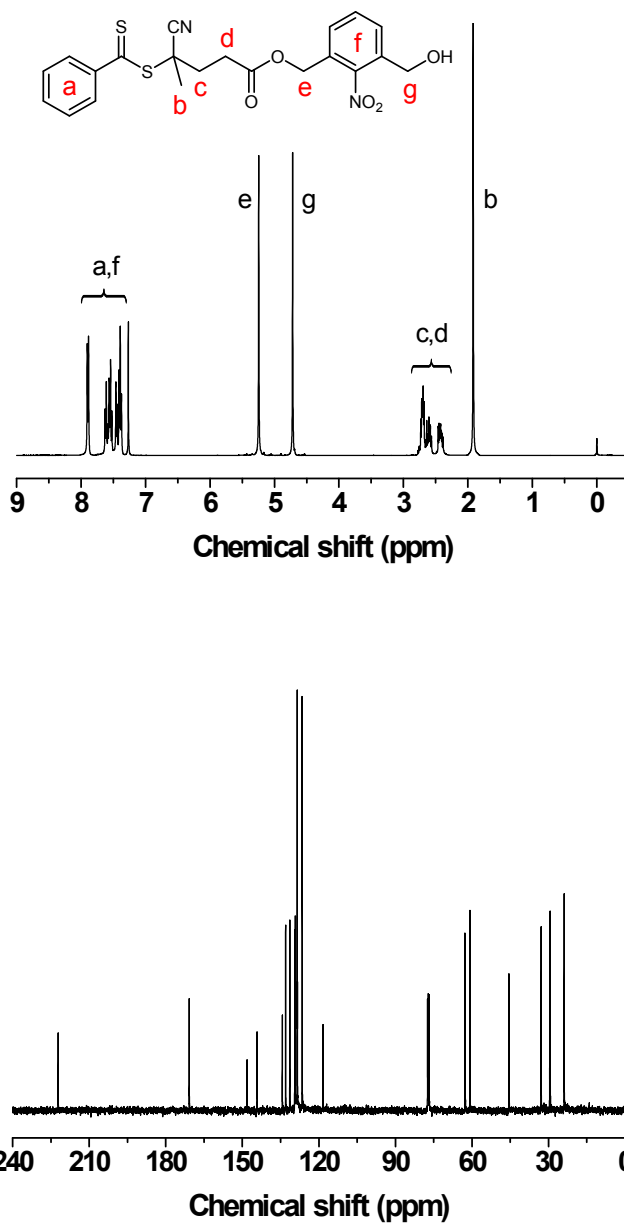

**Fig. S1**  $^1\text{H}$  (top) and  $^{13}\text{C}$  (bottom) NMR spectra of HNCP.

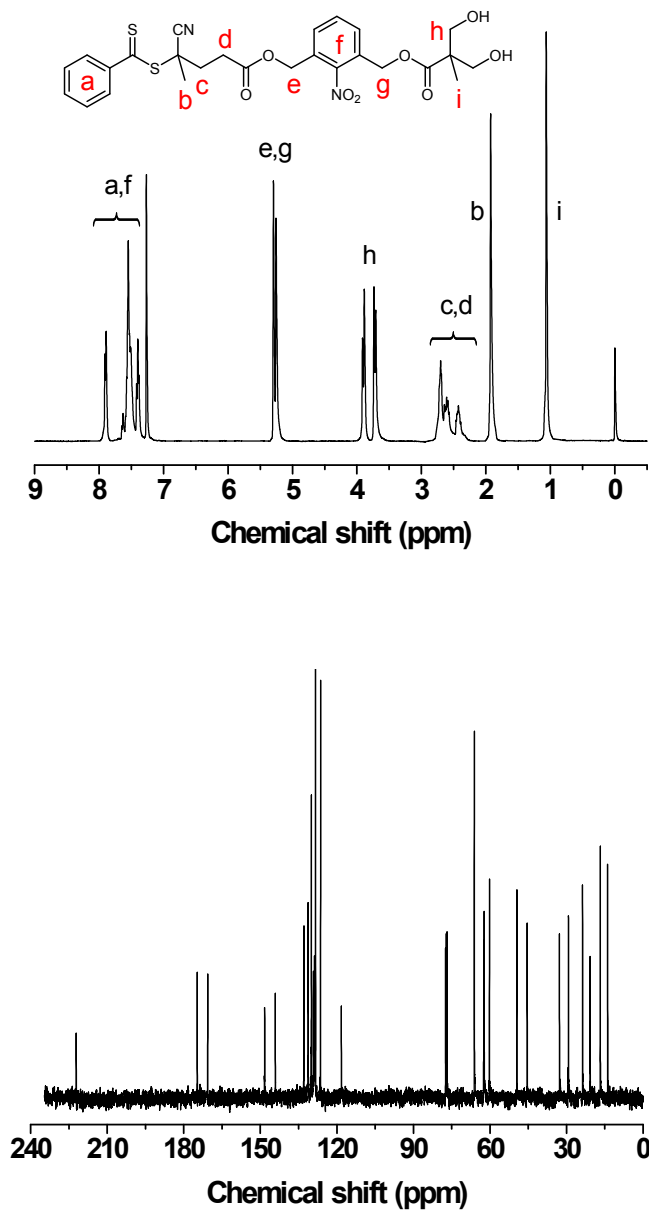

**Fig. S2**  $^1\text{H}$  (top) and  $^{13}\text{C}$  (bottom) NMR spectra of DNCP.

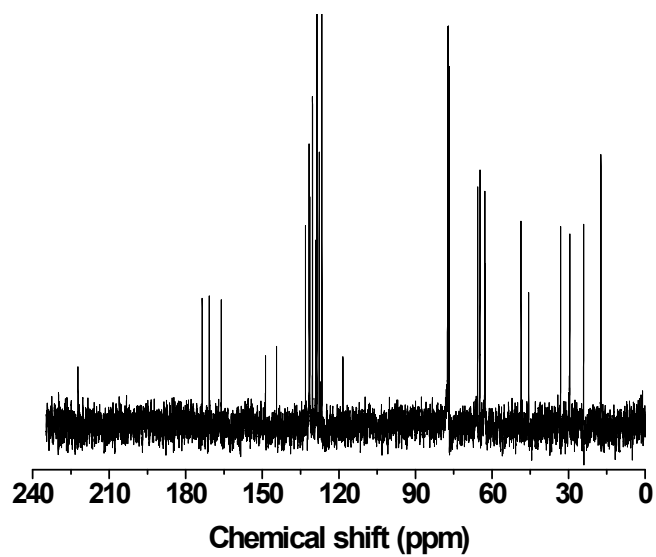

**Fig. S3**  $^{13}\text{C}$  NMR spectrum of ANCP.

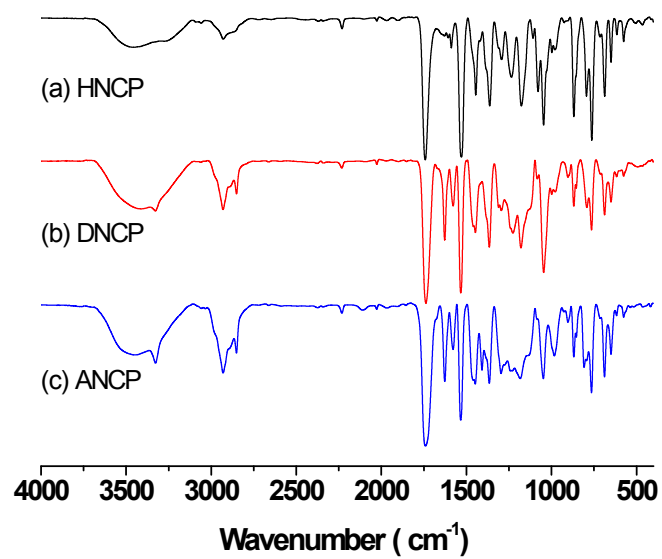

**Fig. S4** IR spectra of ANCP and its precursors.

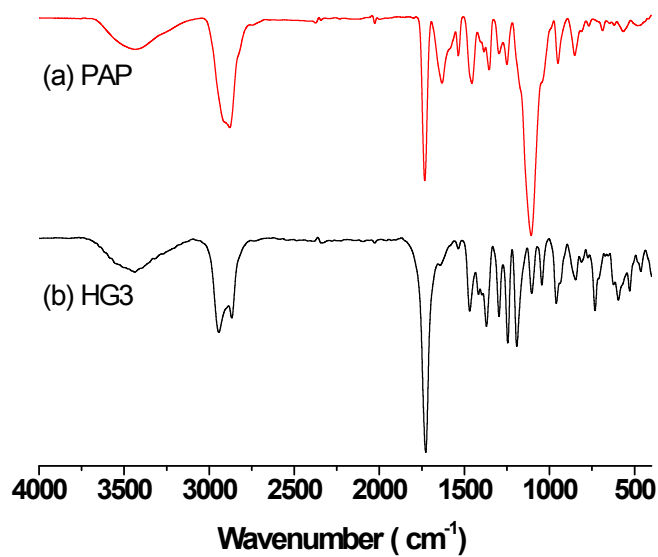

**Fig. S5** IR spectra of hyperbranched PAP (a) and PAP-g-PCL (b).

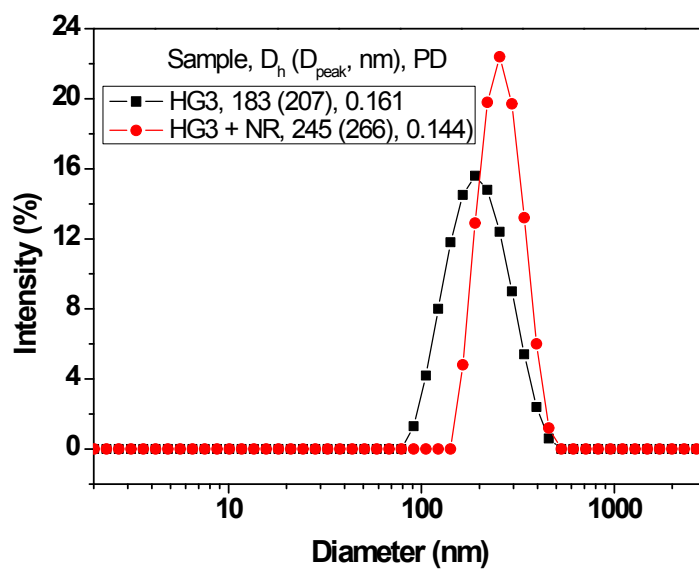

**Fig. S6** DLS plots of blank ( $c_{\text{polymer}} = 0.50 \text{ mg mL}^{-1}$ ) and NR-loaded ( $c_{\text{polymer}} = 0.45 \text{ mg mL}^{-1}$ ) copolymer aggregates formed by HG3 in PBS solution (50 mM, pH 7.4) at 37 °C.

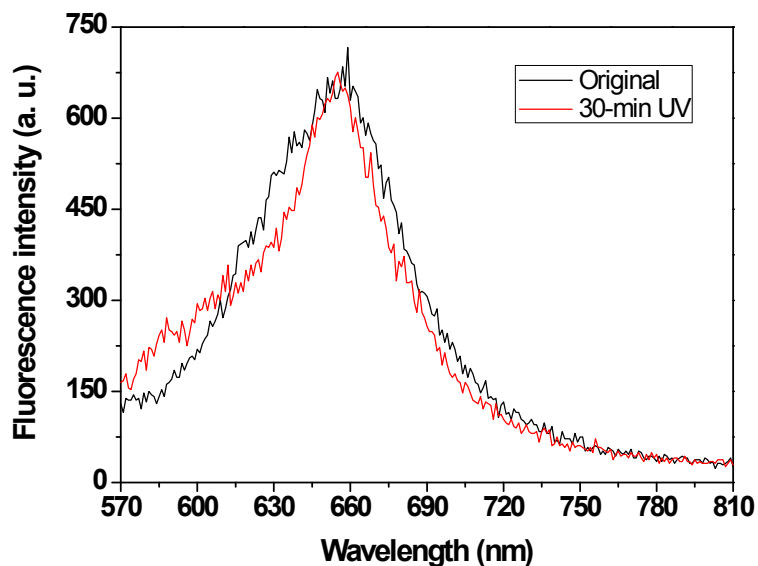

**Fig. S7** Fluorescence spectra ( $\lambda_{\text{ex}} = 550 \text{ nm}$ ) of NR-bearing saturated aqueous solution before and after 30-min UV irradiation.

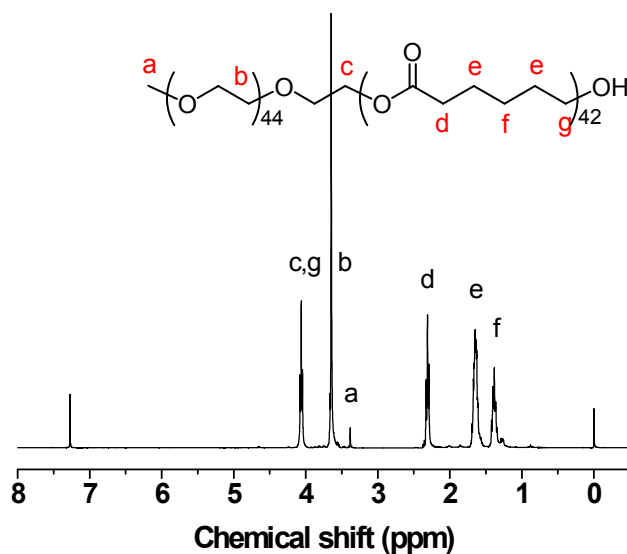

**Fig. S8** <sup>1</sup>H NMR spectrum of PEG-*b*-PCL. The copolymer ( $M_{n,\text{NMR}} = 6800$ , PDI = 1.18) was synthesized by CL polymerization initiated with MPEG using  $\text{Sn}(\text{Oct})_2$  catalyst in toluene at 90 °C.

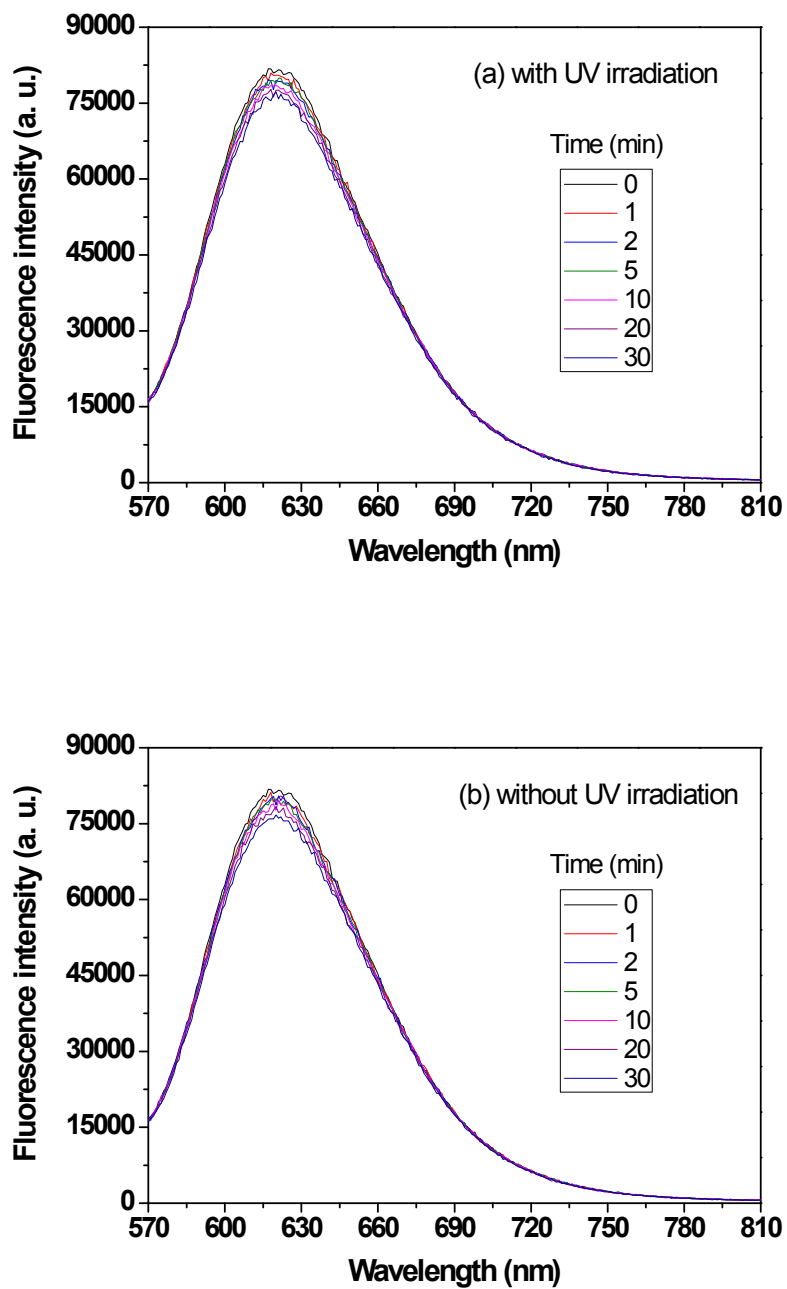

**Fig. S9** Influence of time (with (a) or without (b) UV irradiation (365 nm, 10.0 mW cm<sup>-2</sup>)) on fluorescence spectra ( $\lambda_{\text{ex}} = 550$  nm) of NR-loaded PEG-*b*-PCL aggregates ( $c_{\text{polymer}} = 0.50$  mg mL<sup>-1</sup>, DLC = 8.24%) in PBS solution (50 mM, pH 7.4) at 37 °C.

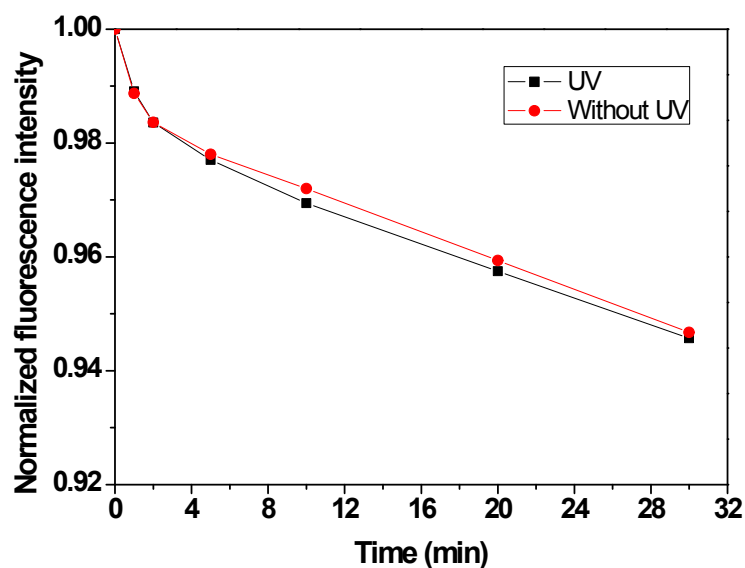

**Fig. S10** Influence of UV irradiation time on normalized fluorescence intensity of NR-loaded PEG-*b*-PCL aggregates ( $c_{\text{polymer}} = 0.50 \text{ mg mL}^{-1}$ , DLC = 8.24%) in PBS solution (50 mM, pH 7.4) at 37 °C, in which the experimental errors were within  $\pm 0.005$ .

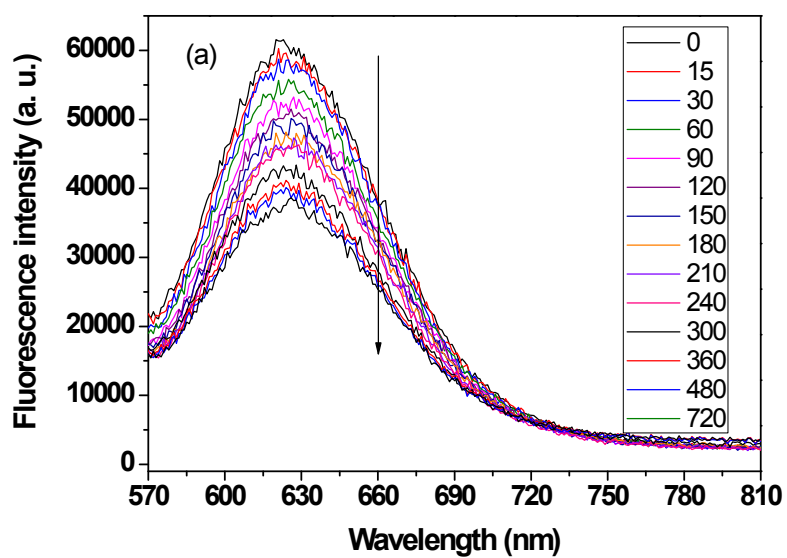



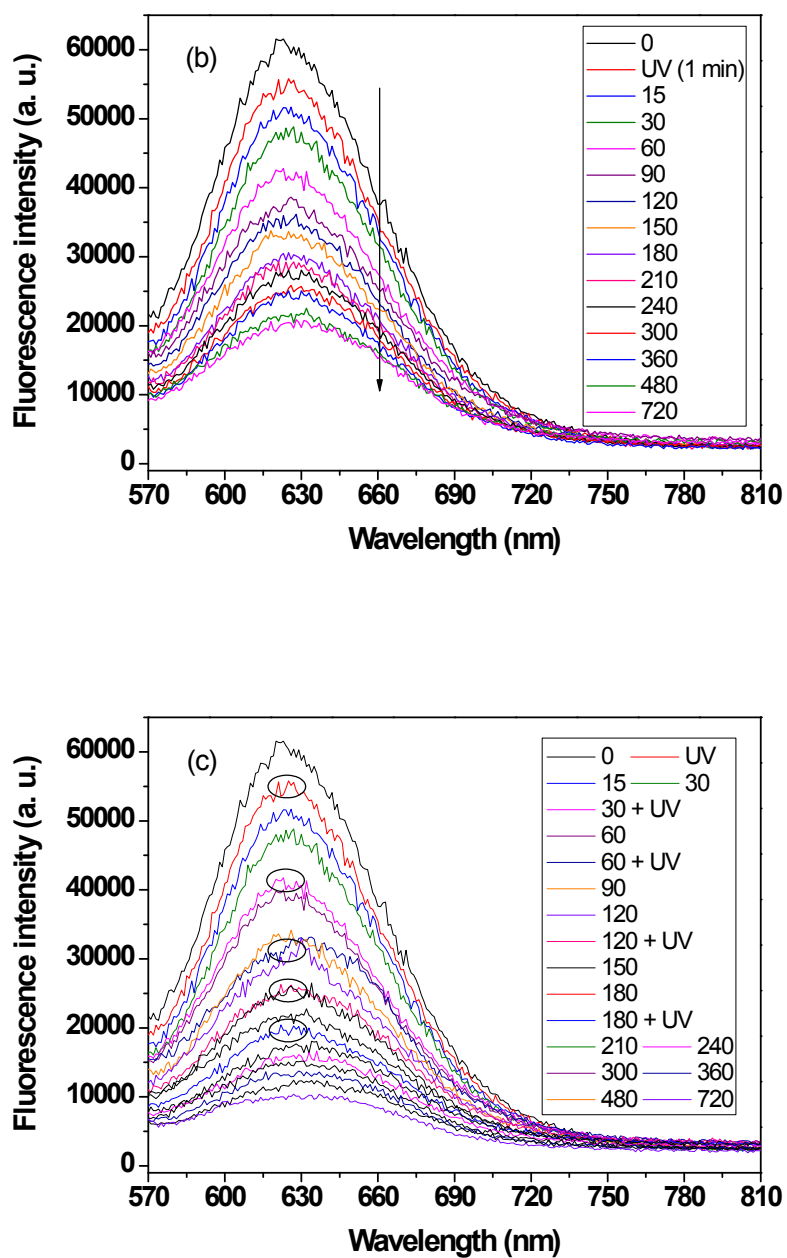

**Fig. S11** Evolution of fluorescence spectra of NR-loaded HG3 aggregates ( $c = 0.45 \text{ mg mL}^{-1}$ ,  $\lambda_{\text{ex}} = 550 \text{ nm}$ ) in PBS solution (50 mM, pH 7.4) at 37 °C with time (unit: min): (a) without UV irradiation; (b) with 1-min light irradiation at the beginning of release process; (c) with 1-min light irradiation at each particular time of 0, 30, 60, 120 and 180 min (the circles were inserted to denote the fluorescence spectra after UV irradiation).
